# Supplementary material
Source: publisher site journal article supplement (https://www.dovepress.com/article/395327)
Supplement: Supplementary file 1 [file get_supplementary_file.php]

**Appendix 1 Interview Protocol**

**Patient** **Interview Protocol**

**A. Introductory Questions**

1.Tell me about your understanding/beliefs of inhalation therapy.

2.How long have you been undergoing inhalation therapy? How do you feel about it?

**B. SEIPS Elements Questions**

Person(s):

1.Can you recall a time when someone (including yourself) made it easier for you to adhere to inhalation therapy?

2.Can you recall a time when someone (including yourself) made it more difficult for you to adhere to inhalation therapy?

Tasks:

1.Could you please describe your usual process for conducting inhalation therapy?

2.Is there anything in this process that makes adhering to inhalation therapy easier?

3.Is there anything in this process that makes adhering to inhalation therapy more difficult?

Tools and Technology:

1.How has the tool(device)/technology assisted you in adhering to inhalation therapy?

2.How has the tool(device)/technology hindered your ability to adhere to inhalation therapy?

Environment:

1.What factors in your surrounding environment (eg. home, work etc.) make it easier for you to adhere to inhalation therapy?

2.What factors in your surrounding environment (eg. home, work etc.) make it more difficult for you to adhere to inhalation therapy?

Organization:

1.Would you be able to describe a time in which the organization (eg. the system, the society, etc.) helped you adhere to inhalation therapy?

2.Would you be able to describe a time in which the organization (eg. the system, the society, etc.) hindered you adhere to inhalation therapy?

Do you have anything you’d like to add before we end? (Special experience? Advice for inhaler design?)

**HCP Interview Protocol**

**A. Introductory Questions**

1.Please tell me what you do in inhalation therapy.

2.What method(s) do you use to assess if patients are adhering to their inhalation therapy?

**B. SEIPS Elements Questions**

Person(s):

1.Who do you think can help your patient more easily adhere to inhalation therapy？

2.Who do you think will prevent your patient from adhering to inhalation therapy?

Tasks:

1.Have you ever trained/educated your patients on how to use inhalation devices?

If yes

a. Could you please describe the usual process for training/educating patient using their inhaler device?

b. Is there anything in this process that makes your patient adhering to inhalation therapy easier?

c. Is there anything in this process that makes your patient adhering to inhalation therapy more difficult?

Tools and Technology:

1.Can you describe any tools/technology that can make it easier for your patients to adhere to inhalation therapy?

2.Can you describe any tools/technology that can make it more difficult for your patients to adhere to inhalation therapy?

Environment:

1.What factors in your patient's surrounding environment do you think make it easier for them to adhere to inhalation therapy?

2.What factors in your patient's surrounding environment do you think make it more difficult for them to adhere to inhalation therapy?

Organization:

1.In your opinion, what kind of organization (eg. the system, the society, etc.) could make it easier for patients to adhere to inhalation therapy?

2.In your opinion, what kind of organization (eg. the system, the society, etc.) could make it more difficult for patients to adhere to inhalation therapy?

Do you have anything you’d like to add before we end? (Special experience? Advice for inhaler design? Adherence interventions?)

**Appendix 2 Participants Quotes**

| **Themes** | **Subtheme** | **Patients Quotes** | **HCPs Quotes** |
| --- | --- | --- | --- |
| **Person** | Patient Ability | "I know I should take a deep breath during inhalation (therapy), but my lung condition prevented me from doing so. I can't even breathe easily." "I want to hold the inhaler firmly, but my hands keep shaking. I have to spend a long time trying to control it." "Some patients mistakenly believe that the absence of clinical symptoms means they have been cured. Chronic respiratory diseases, such as asthma, are difficult to be completely cured and must be managed with inhaled medication for a very long time." "To be honest, I didn't understand the words the doctor used, so all I could do was pay the money and get the inhaled medicine that I didn't know. Wouldn't it be nice if they explained it to me in a way I understand." "My doctor always uses ambiguous words, such as perhaps, probably, and maybe, which leaves me feeling uncertain. How can I put my trust in him, given that his diagnosis is so hazy?" "I knew I had a poor memory, so I set an alarm on my phone to remind myself." | "My prescriptions take into account the physical abilities of the patient. For example, an SMI (soft mist inhaler) is more suitable for elderly patients because it requires less inspiratory flow rate. " “Some patients mistakenly believe that the absence of clinical symptoms means they have been cured. Chronic respiratory diseases, such as asthma, are difficult to be completely cured and must be managed with inhaled medication for a very long time.” |
| Emotional Experience | "Every time I use this inhaler, I hear the sound of the internal parts turning, which increases my anxiety and resistance." " I've used the same device for over a year now, and I find it extremely boring and annoying to repeat the same operation every day like a robot." | "As doctors, we put the patient's health first, and the patient's feelings regarding inhalers seem to be less important." |
| **Task** | Task Type | "My entire face-to-face consultation lasted 10 minutes, and the doctor spent up to 1-2 minutes explaining the approximate use of an inhaler." "It's hard to master a single inhalation technique, and it's even harder to master two at the same time, and I confuse these different techniques all the time." "While the new device looks the same as the old one, the actual operation is different. At first, I followed the previous method, but the operation always failed." | "I see dozens of patients a day, so I don't have time to explain everything about the device." "I have an empty inhaler available to demonstrate to the patient how to inhale the medication, so that the patient will understand my instructions more quickly and improve the effectiveness of our communication." |
| Frequency and Flexibility | "Despite setting an alarm, I sometimes forget to use my inhaler every morning and evening. It would be so much easier if I only had to use an inhaler once a day." "I often have to work overtime or take business trips, so I am not flexible about treatment at all. Not to mention that I don't know when I'm going to have an asthma attack, so I just try to carry the device with me 24/7. I sometimes feel like I'm a pet on a leash." | "Pain is a part of treatment, maybe that's the price of fighting the disease, patients always have to go through it for the sake of health." |
| **Tool** | Type of Inhalers | "There are times when I remember to press the button but forget to inhale, and there are times when I remember to inhale but forget to press (the button). It's always out of sync anyway." "Does the price of the inhaler increase as the devices become digital? If so, I don't know if it's worth it." | "He was initially a “disobedient” patient, but after changing to a different type of inhaler, he used it every time obediently." |
| Usability of Inhalers | "The only response I received was a change in the numbers on the counter." "All I felt just a bitter taste in my mouths upon tasting the drugs.” "I'm not sure if what I've done is right or wrong…I wish this device could give me more info and hints at that moment." "I mark my calendar after each inhalation so I know exactly how I'm doing. Usually, if I notice I've missed doses in the past week, I'll be extra careful to use an inhaler on time this week. " "There's no need to consciously think about how to use the device, just opening it, inhaling it, and closing it. All of this happened so naturally!" | "It also saves us time if we don't need to spend extra time teaching patients how to use the device, and the time savings can be seen with several more patients." |
| **Physical Environment** | Home Environment | "Since I rinse my mouth every time I use the inhaler, I put it on the washstand in the bathroom to make it easier, but the humidity and heat in the bathroom cause the powder in the inhaler to agglomerate and denature quickly." "On my bedside table I kept my reliever inhaler and maintenance inhaler, and once I confused them, I used the relief inhaler as a maintenance one. That's terrible!" |  |
| COVID-19 | "I think I'm in the vulnerable group because I have poor lung function, it's safer for me to stay at home and go out less." "With a mask, I can't inhale the drug, but if I don't wear a mask and use an inhaler, I'm afraid I'll get infected." |  |
| **Culture and Social** | Cultural Beliefs | "There is an old Chinese saying “All medicine has du (poison) to some degree”, so as long as there are no symptoms, there is no need to use an inhaler again." |  |
| Social Stigma | "It makes me feel ashamed and embarrassed to use the inhaler around my family or colleagues...It's all my fault since everyone else is healthy and I have to use this (inhaler) to get well." "When I was hospitalized, the nurses always said that I was not doing the correct steps, complaining that I couldn't learn it, which made her very frustrated. I know she would be more willing to take care of 'smart patient than 'dumb patient' like me." |  |
